# Supplementary material for: Crystal structure and physical properties of indium flux grown RE2AuSi3 (RE = Eu, Yb)
Source: Royal Society of Chemistry journal article supplement (doi:10.1039/c3ce41198b), 2013-01-01
Supplement: c3ce41198b.pdf [file c3ce41198b.pdf]

**Supplementary Information for**  
**Crystal Structure and Physical Properties of Indium Flux Grown**  
 **$RE_2AuSi_3$  ( $RE = Eu, Yb$ )**

**Sumanta Sarkar,<sup>1</sup> Matthias J. Gutmann,<sup>2</sup> Sebastian C. Peter<sup>1\*</sup>**

<sup>1</sup>New Chemistry Unit, Jawaharlal Nehru Centre for Advanced Scientific Research, Jakkur,  
Bangalore, 560064, India

<sup>2</sup>ISIS Facility, STFC-Rutherford Appleton Laboratory, Didcot, OX11 0QX, United Kingdom

---

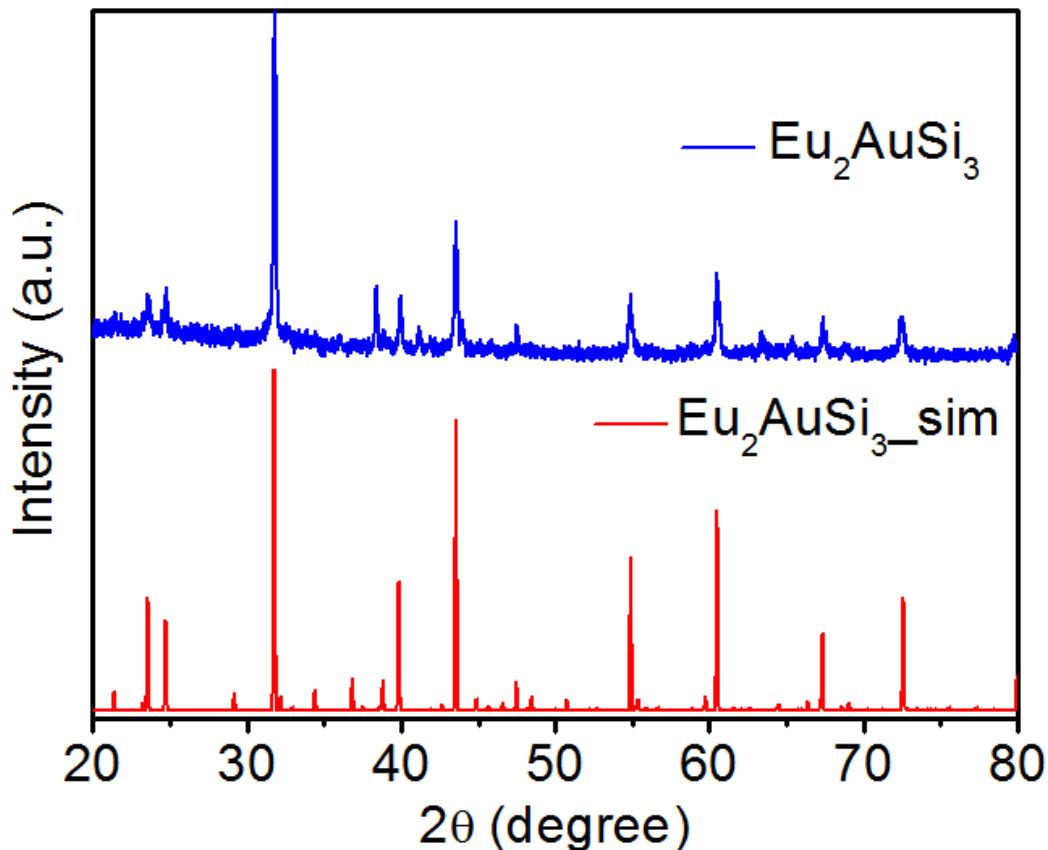

**Figure S1.** Comparison of PXRd pattern of polycrystalline sample of  $Eu_2AuSi_3$  with that of simulated pattern obtained from the data of X-ray diffraction on a single crystal.

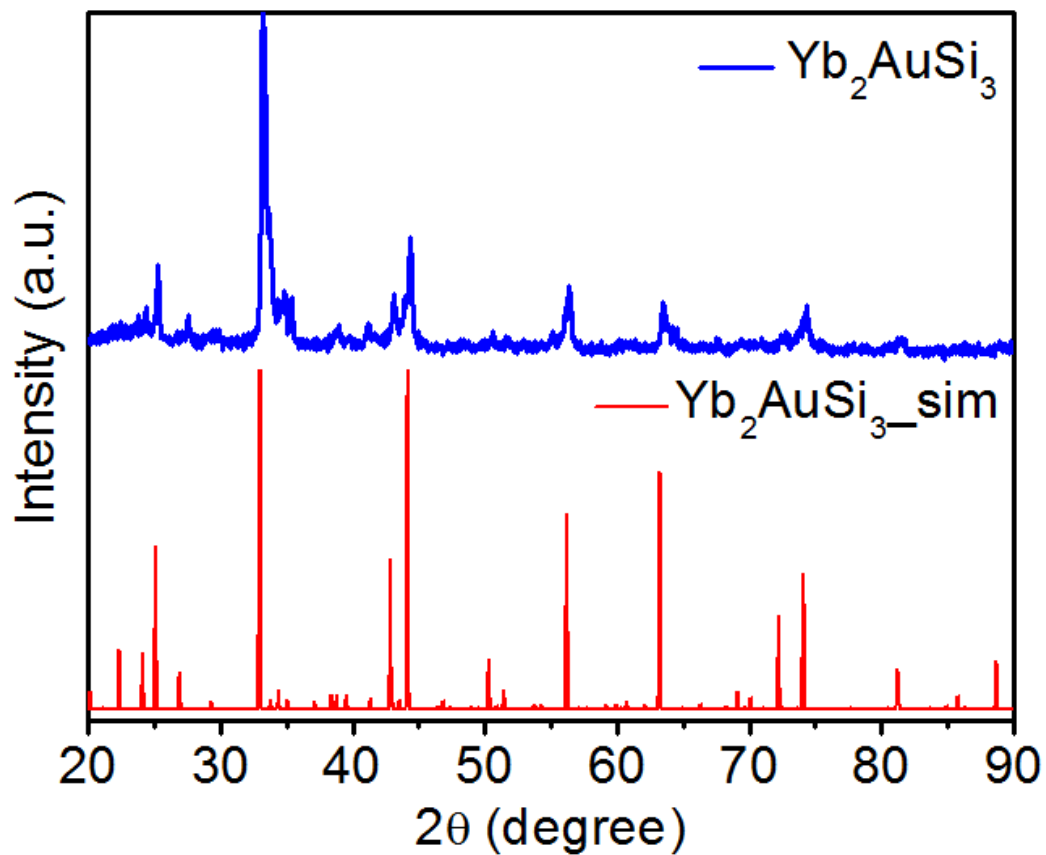

**Figure S2.** Comparison of PXR pattern of polycrystalline sample of  $\text{Yb}_2\text{AuSi}_3$  with that of simulated pattern obtained from the data of X-ray diffraction on a single crystal.

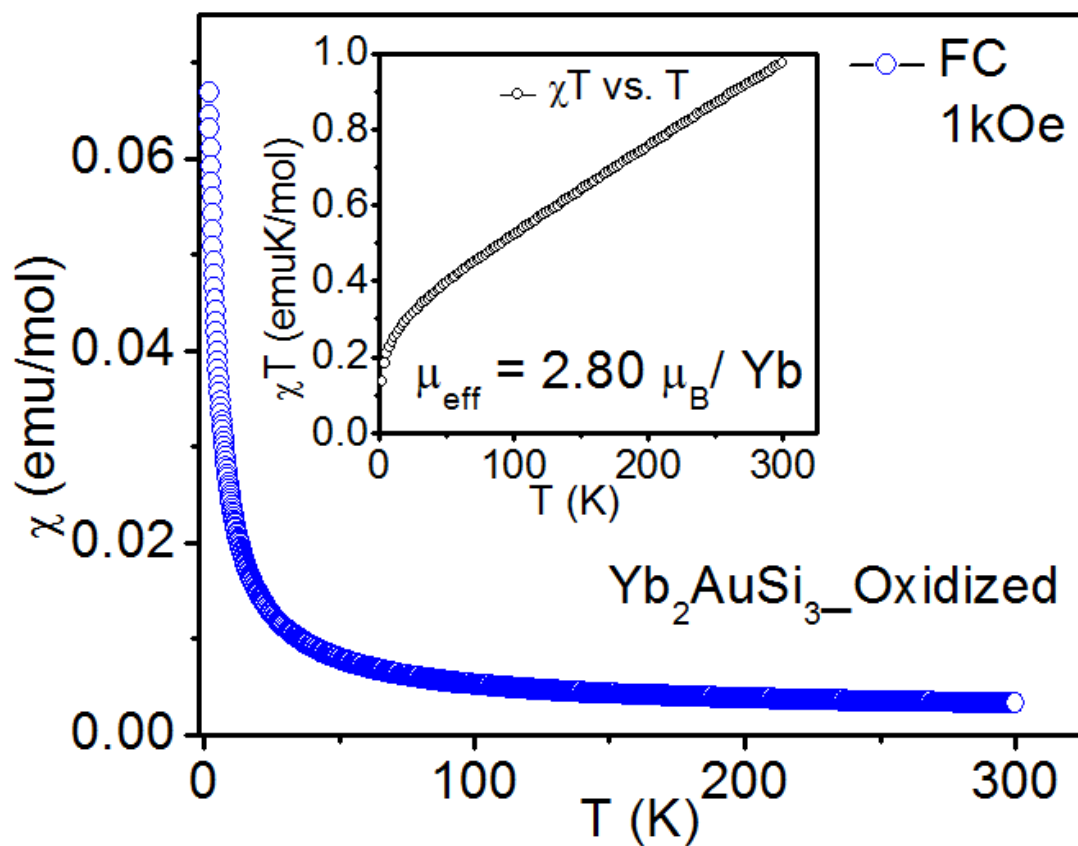

**Figure S3.** Temperature dependent molar magnetic susceptibility of  $\text{Yb}_2\text{AuSi}_3$  after weeks of synthesis at 1 k Oe applied magnetic field. The inset represents the plot of  $\chi T$  vs. temperature at the same field. The effective magnetic moment is  $2.80 \mu_{\text{B}}/\text{Yb}$ .

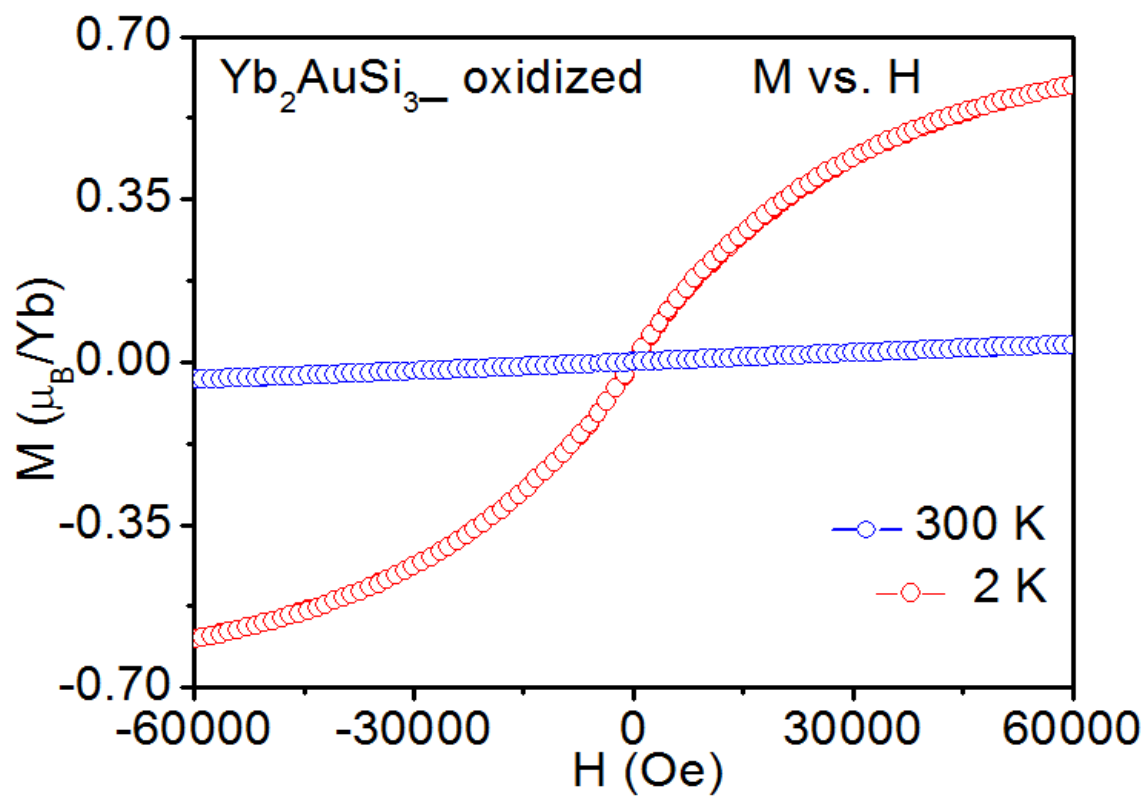

**Figure S4.** Field dependence of magnetic moment of oxidized Yb<sub>2</sub>AuSi<sub>3</sub>.
